# Supplementary material for: Clusterin Protects Lipotoxicity-Induced Apoptosis via Upregulation of Autophagy in Insulin-Secreting Cells
Source: PubMed Central journal article supplement — Endocrinol Metab (Seoul). 2020 Nov 1;35(4):943–53. doi: 10.3803/EnM.2020.768 (PMC7803614; doi:10.3803/enm.2020.768), 2020-11-01
Supplement: enm-2020-768-suppl1.pdf [file enm-2020-768-suppl1.pdf]

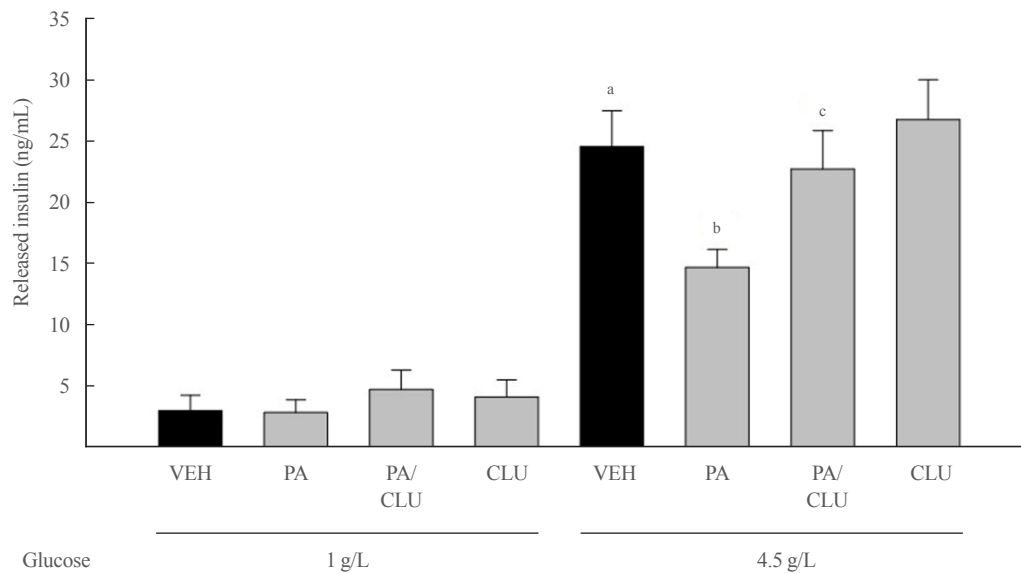

**Supplemental Fig. S1.** Clusterin (CLU) improves glucose-stimulated insulin secretion (GSIS) in lipotoxicity-condition. Mouse insulinoma 6 (MIN6) cells were incubated with 0 or 10  $\mu\text{g/L}$  CLU in presence or absence of 0.5 mM palmitate (PA) for 24 hours. After cells were starved by incubation with glucose free-Krebs Ringer bicarbonate HEPES buffer, insulin secretion was induced in 1 or 4.5 g/L glucose in Dulbecco's Modified Eagle's Medium (DMEM) for 1 hour. Released insulin was measured by mouse insulin enzyme-linked immunosorbent assay (ELISA) kit, and all values are expressed as mean  $\pm$  standard error of the mean ( $n=4-5$ ). <sup>a</sup> $P < 0.001$  compared to vehicle (VEH) of the 1 g/L glucose group; <sup>b</sup> $P < 0.05$  compared to VEH of the 4.5 g/L glucose group; <sup>c</sup> $P < 0.05$  compared to PA of the 4.5 g/L glucose group.
